# Supplementary material for: A Cyclic BMP-2 Peptide Upregulates BMP-2 Protein-Induced Cell Signaling in Myogenic Cells
Source: MDPI journal article supplement (doi:10.3390/polym13152549), 2021-07-31
Supplement: s1 [file s1]

Supplementary Materials:

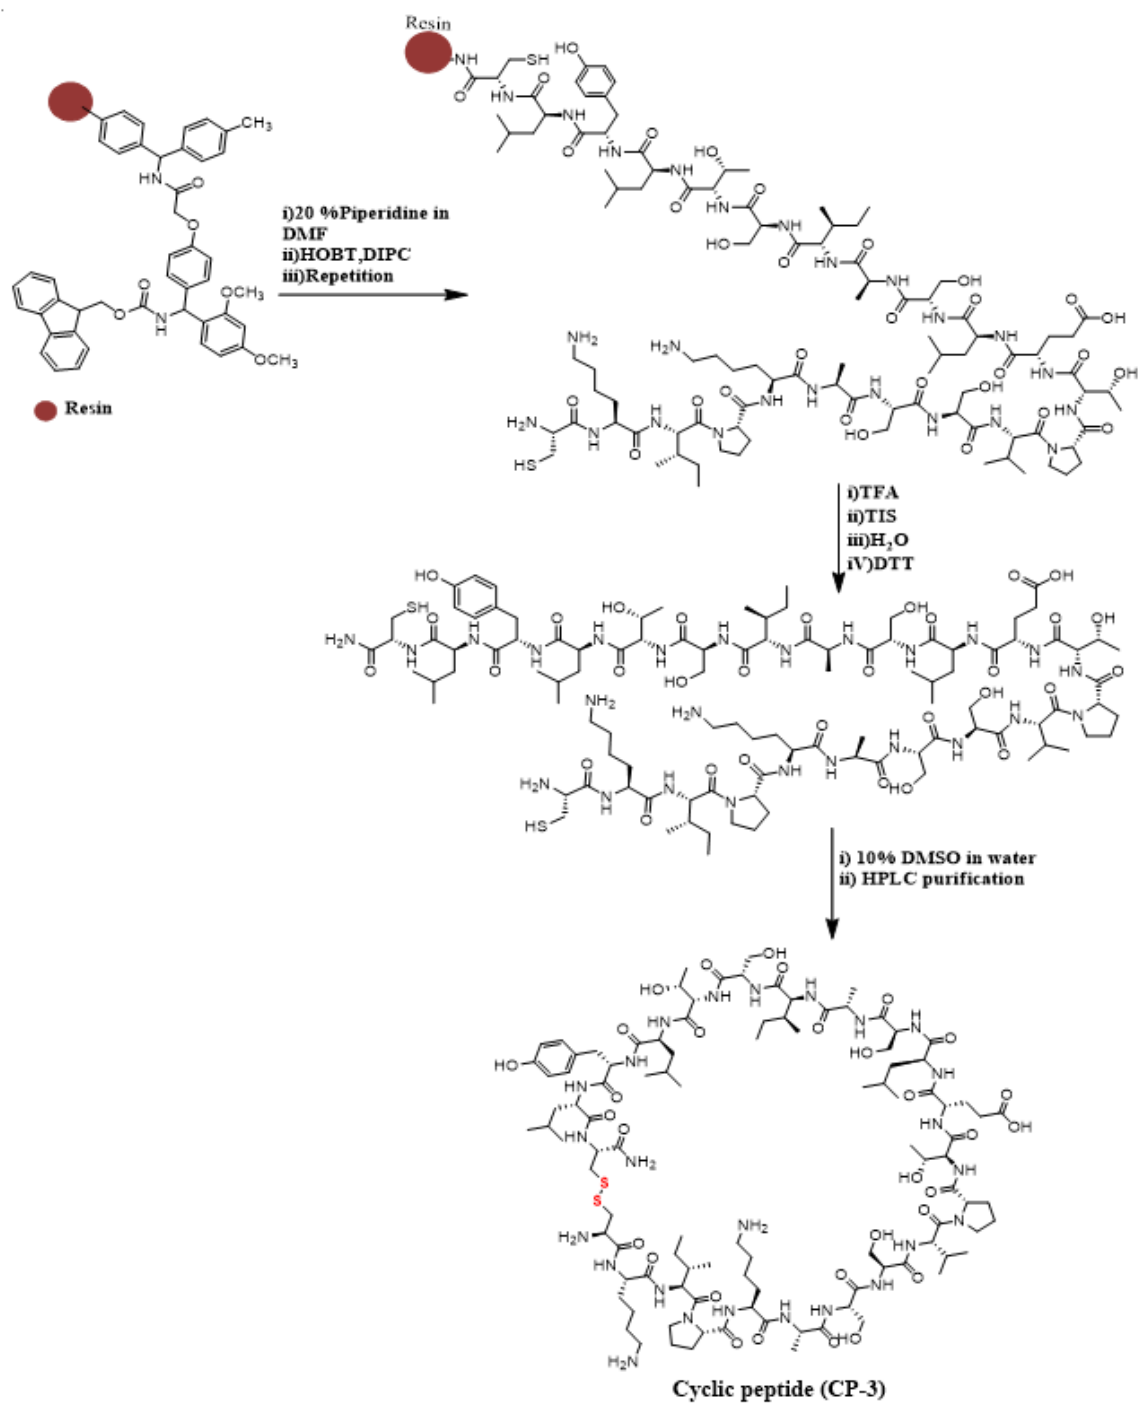

Figure S1. Solid-phase synthesis of peptide (P-05).

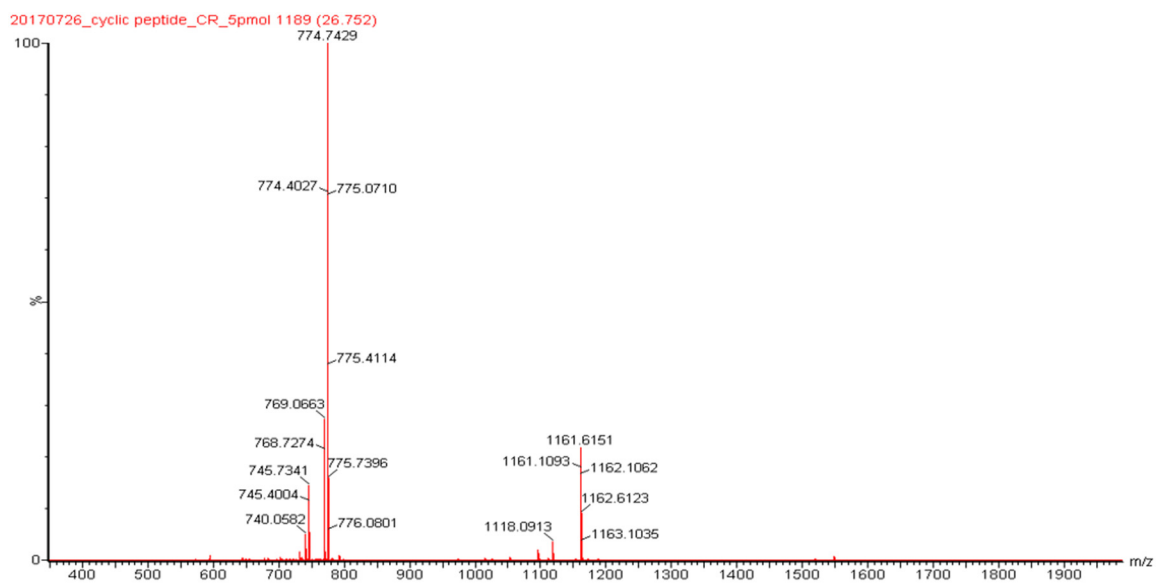

**Figure S2.** ESI-MS spectrum of cyclic peptide P-05.

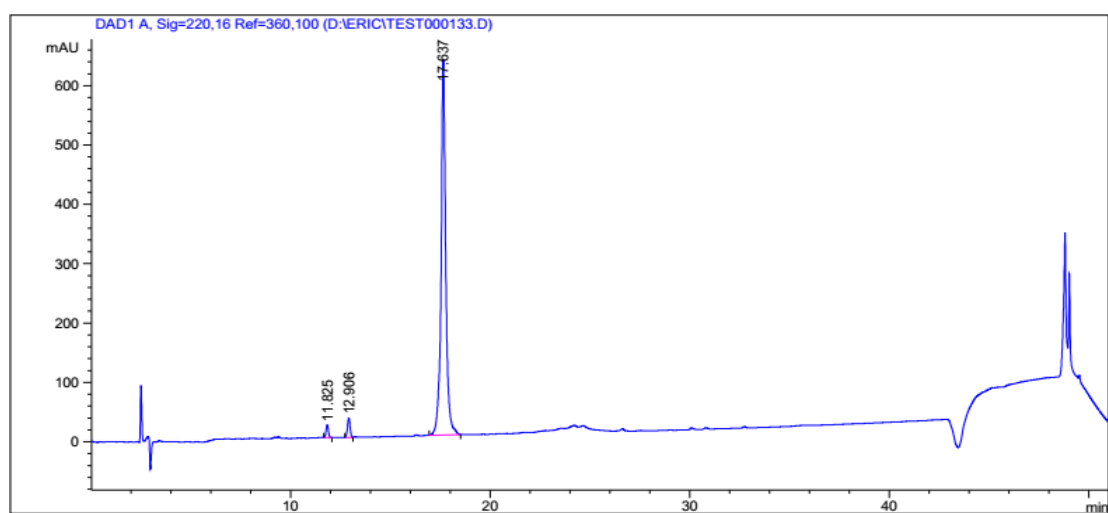

**Figure S3.** Hplc profile of pure cyclic peptide P-05.
